# Supplementary material for: Causal effects of autoimmune diseases on thyroid cancer: a two-sample Mendelian randomization study
Source: PubMed Central journal article supplement (PMC11339619; doi:10.3389/fendo.2024.1401458), 2024-08-08
Supplement: Image_1.pdf [file Image_1.pdf]

*Supplementary Material*

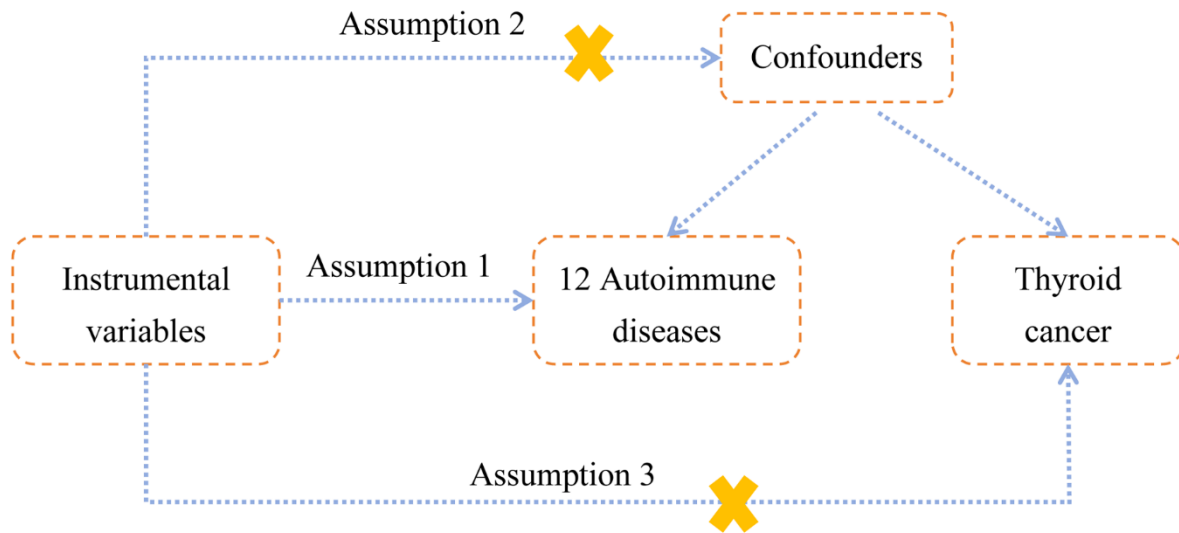

**Figure S1** Assumptions of the Mendelian randomization study
